# Supplementary material for: Circulating Biomarkers of Endothelial Dysfunction and Inflammation in Predicting Clinical Outcomes in Diabetic Patients with Critical Limb Ischemia
Source: MDPI journal article supplement (doi:10.3390/ijms231810641), 2022-09-13
Supplement: s1 [file s1]

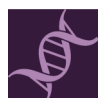

### Clustering and partition tree

The training set contained 65 cases, the clusters had the following proportions: cluster 1 = 23.08%, cluster 2 = 64.62% and cluster 3 = 12.31%. The test set contains 27 cases, the clusters have the following proportions: cluster 1 = 22.22%, cluster 2 = 66.67% and cluster 3 = 11.11%. The maximum accuracy value was used to select the optimal model. The obtained complexity parameter  $cp = 0.244$  was used for the construction of the decision tree. The number of splits is equal to two. The performance characteristics of the decision tree were calculated on the confusion matrix. The overall accuracy of the model is 0.812 (95% c.i. = 0.6192, 0.937). The sensitivity measures per class are equal to 0.667, 0.833, and 1 for classes 1, 2, and 3 respectively. The specificity measures for the classes are equal to 0.952, 0.778, and 0.917 for classes 1, 2, and 3 respectively. The positive predictive value for the classes is equal to 0.8, 0.882, and 0.6 for classes 1, 2, and 3 respectively. The negative predictive value for the classes is 0.909, 0.7 and 0.1 for classes 1, 2 and 3 respectively.

**Table S1.** Descriptive statistics clusters outcome 1 (Wound healing within 3 month).

|                                | Cluster 1 (n =51)    | Cluster 2 (n =41)    | Overall (n = 92)     | p     |
|--------------------------------|----------------------|----------------------|----------------------|-------|
| Age                            | 73.00 [68.00- 80.50] | 72.00 [68.00- 77.00] | 72.50 [68.00- 78.00] | 0.335 |
| Sex Male                       | 40 (78.4%)           | 31 (75.6%)           | 71 (77.2%)           | 0.806 |
| BMI                            | 26.30 [24.44- 28.95] | 26.89 [25.47- 29.30] | 26.68 [24.93- 29.30] | 0.460 |
| Smoking status                 |                      |                      |                      | 0.815 |
| Never                          | 14 (27.5%)           | 13 (32.5%)           | 27 (29.7%)           |       |
| Past                           | 31 (60.8%)           | 24 (60.0%)           | 55 (60.4%)           |       |
| Active                         | 6 (11.8%)            | 3 (7.5%)             | 9 (9.9%)             |       |
| Diabetes type II               | 48 (96.0%)           | 37 (90.2%)           | 85 (93.4%)           | 0.193 |
| Insulin therapy                | 38 (79.2%)           | 29 (72.5%)           | 67 (76.1%)           | 0.616 |
| Carotid artery disease         | 5 (9.8%)             | 3 (7.3%)             | 8 (8.7%)             | 0.728 |
| Stroke or TIA                  | 4 (8.0%)             | 4 (9.8%)             | 8 (8.8%)             | 1.000 |
| Heart failure                  | 7 (13.7%)            | 1 (2.4%)             | 8 (8.7%)             | 0.071 |
| Coronary artery disease        | 22 (43.1%)           | 20 (48.8%)           | 42 (45.7%)           | 0.675 |
| Previous myocardial_infarction | 4 (7.8%)             | 6 (14.6%)            | 10 (10.9%)           | 0.332 |
| Valvular prosthesis            | 1 (2.0%)             | 3 (7.3%)             | 4 (4.4%)             | 0.327 |
| Atrial fibrillation            | 17 (33.3%)           | 5 (12.2%)            | 22 (23.9%)           | 0.026 |
| <b>Biomarkers</b>              |                      |                      |                      |       |
| sCD40L pg/mL                   | 14.10 [9.05- 19.73]  | 10.78 [6.42- 15.24]  | 11.73 [7.32- 17.91]  | 0.070 |
| IFN- $\alpha$ 2 pg/mL          | 8.00 [8.00- 8.00]    | 8.00 [8.00- 8.00]    | 8.00 [8.00- 8.00]    | 0.621 |
| IFN- $\gamma$ pg/mL            | 1.28 [1.21- 1.28]    | 1.28 [1.28- 9.48]    | 1.28 [1.28- 3.00]    | 0.013 |
| IL-1Ra pg/mL                   | 7.58 [3.60- 13.46]   | 7.38 [4.26- 10.48]   | 7.56 [3.82- 12.47]   | 0.833 |
| IL-2 pg/mL                     | 0.64 [0.64- 0.64]    | 0.64 [0.64- 0.64]    | 0.64 [0.64- 0.64]    | 0.900 |
| IL-4 pg/mL                     | 1.48 [0.64- 3.57]    | 1.60 [0.64- 4.00]    | 1.60 [0.64- 3.86]    | 0.875 |
| IL-5 pg/mL                     | 3.70 [2.30- 7.09]    | 3.18 [2.09- 6.54]    | 3.54 [2.29- 6.88]    | 0.369 |
| IL-6 pg/mL                     | 5.33 [2.37- 8.51]    | 4.67 [1.98- 9.50]    | 4.83 [2.15- 9.08]    | 0.687 |
| IL-10 pg/mL                    | 2.56 [2.56- 2.56]    | 2.56 [2.56- 2.56]    | 2.56 [2.56- 2.56]    | 0.534 |
| IL-13 pg/mL                    | 6.40 [6.40- 6.40]    | 6.40 [6.40- 10.55]   | 6.40 [6.40- 10.12]   | 0.348 |
| IL-18 pg/mL                    | 34.25 [26.02- 46.81] | 30.23 [17.96- 45.69] | 34.01 [23.73- 46.45] | 0.384 |
| TNF- $\alpha$ ng/mL            | 18.24 [14.34- 29.58] | 20.14 [10.10- 40.66] | 19.14 [12.00- 30.75] | 0.942 |
| Angiopoietin-2 ng/mL           | 2.98 [2.35- 4.52]    | 2.59 [1.65- 4.16]    | 2.92 [1.92- 4.51]    | 0.260 |
| Endoglin ng/mL                 | 1.61 [1.34- 2.17]    | 1.74 [1.25- 2.13]    | 1.71 [1.31- 2.15]    | 0.942 |

|                      |                           |                           |                           |       |
|----------------------|---------------------------|---------------------------|---------------------------|-------|
| Endothelin-1 pg/mL.  | 2.70 [2.70- 2.70]         | 2.70 [1.92- 2.70]         | 2.70 [2.70- 2.70]         | 0.188 |
| E-Selectin ng/mL     | 32.97 [24.20- 41.04]      | 34.19 [23.37- 42.37]      | 34.19 [23.82- 42.13]      | 0.847 |
| Thrombomodulin ng/mL | 1.10 [0.75- 1.54]         | 1.25 [0.85- 1.99]         | 1.13 [0.82- 1.82]         | 0.184 |
| sRAGE pg/mL.         | 62.17 [30.21- 97.14]      | 49.51 [35.85- 92.81]      | 56.21 [31.90- 97.12]      | 0.707 |
| sICAM.1 ng/mL        | 189.40 [140.83- 252.43]   | 204.75 [179.60- 289.79]   | 201.71 [154.75- 263.22]   | 0.237 |
| P-Selectin ng/mL     | 119.01 [83.66- 139.79]    | 92.43 [63.86- 127.10]     | 102.77 [74.50- 139.38]    | 0.206 |
| sVCAM.1 ng/mL        | 1049.39 [874.59- 1269.58] | 1028.05 [876.21- 1199.38] | 1036.44 [870.09- 1239.68] | 0.621 |
| PAI-1 ng/mL          | 186.80 [158.46- 262.14]   | 195.70 [138.07- 235.45]   | 189.48 [147.70- 241.46]   | 0.367 |
| vWF µg/mL.           | 26.43 [19.41- 38.28]      | 28.95 [17.03- 41.14]      | 26.85 [17.90- 40.02]      | 0.858 |
| <b>Laboratory</b>    |                           |                           |                           |       |
| White blood cells    | 9.10 [7.65- 10.35]        | 8.80 [6.90- 11.00]        | 9.05 [7.25- 10.72]        | 0.643 |
| Haemoglobin          | 12.40 [11.60- 13.60]      | 11.20 [10.40- 12.60]      | 12.10 [10.80- 13.22]      | 0.010 |
| Platelets            | 269.00 [204.50- 331.00]   | 295.00 [240.00- 331.00]   | 277.50 [216.75- 333.00]   | 0.229 |
| Neutrophils          | 6.40 [5.20- 7.55]         | 6.60 [4.10- 7.80]         | 6.40 [4.68- 7.80]         | 0.795 |
| Lymphocytes          | 1.80 [1.45- 2.15]         | 1.90 [1.30- 2.20]         | 1.80 [1.40- 2.20]         | 0.841 |
| Monocytes            | 0.70 [0.50- 0.85]         | 0.60 [0.50- 0.80]         | 0.70 [0.50- 0.80]         | 0.361 |
| EGFR (Cock)          | 55.74 [42.66- 78.81]      | 63.32 [43.43- 86.24]      | 58.69 [42.70- 84.93]      | 0.502 |
| Triglycerides        | 121.00 [88.50- 175.00]    | 121.00 [92.00- 150.00]    | 121.00 [89.75- 161.50]    | 0.646 |
| HDL                  | 39.00 [33.00- 47.50]      | 37.00 [34.00- 43.00]      | 38.00 [33.00- 46.00]      | 0.385 |
| LDL                  | 65.80 [51.60- 85.40]      | 65.20 [51.20- 90.20]      | 65.60 [51.50- 87.80]      | 0.689 |
| Hba1c                | 7.27 [6.36- 8.05]         | 7.37 [6.36- 8.19]         | 7.32 [6.34- 8.12]         | 0.759 |
| CRP                  | 0.90 [0.20- 3.20]         | 1.60 [0.30- 2.80]         | 1.20 [0.25- 3.20]         | 0.350 |
| Albumin              | 3.63 [3.27- 3.95]         | 3.59 [3.30- 4.06]         | 3.62 [3.29- 3.98]         | 0.912 |

**Table S2.** Descriptive statistics clusters outcome 2 (New re-vascularization).

|                         | Cluster 1 (n = 70)   | Cluster 2 (n = 22)   | Overall (n =72)      | p                |
|-------------------------|----------------------|----------------------|----------------------|------------------|
| Age                     | 71.00 [67.25- 77.75] | 75.50 [69.50- 80.50] | 72.50 [68.00- 78.00] | 0.132            |
| Sex Male                | 51 (72.9%)           | 20 (90.9%)           | 71 (77.2%)           | 0.090            |
| BMI                     | 26.09 [24.22- 28.93] | 27.43 [26.16- 30.15] | 26.68 [24.93- 29.30] | <b>0.033</b>     |
| Smoking status:         |                      |                      |                      | 0.402            |
| Never                   | 23 (33.3%)           | 4 (18.2%)            | 27 (29.7%)           |                  |
| Past                    | 39 (56.5%)           | 16 (72.7%)           | 55 (60.4%)           |                  |
| Active                  | 7 (10.1%)            | 2 (9.1%)             | 9 (9.9%)             |                  |
| Diabetes type II        | 65 (92.9%)           | 20 (95.2%)           | 85 (93.4%)           | 0.803            |
| Insulin therapy         | 51 (75.0%)           | 16 (80.0%)           | 67 (76.1%)           | 0.771            |
| Carotid artery disease  | 4 (5.7%)             | 4 (18.2%)            | 8 (8.7%)             | 0.090            |
| Stroke or TIA           | 6 (8.7%)             | 2 (9.1%)             | 8 (8.8%)             | 1.000            |
| Heart failure           | 4 (5.7%)             | 4 (18.2%)            | 8 (8.7%)             | 0.090            |
| Coronary artery disease | 28 (40.0%)           | 14 (63.6%)           | 42 (45.7%)           | 0.085            |
| Myocardial infarction   | 6 (8.6%)             | 4 (18.2%)            | 10 (10.9%)           | 0.243            |
| Valvular prosthesis     | 3 (4.3%)             | 1 (4.8%)             | 4 (4.4%)             | 1.000            |
| Atrial fibrillation     | 0 (0.0%)             | 22 (100.0%)          | 22 (23.9%)           | <b>&lt;0.001</b> |
| <b>Biomarkers</b>       |                      |                      |                      |                  |
| sCD40L pg/mL            | 11.98 [7.72- 17.48]  | 11.28 [5.04- 18.52]  | 11.73 [7.32- 17.91]  | 0.713            |
| IFN-α2 pg/mL            | 8.00 [8.00- 8.00]    | 8.00 [8.00- 8.00]    | 8.00 [8.00- 8.00]    | 0.454            |
| IFN-γ pg/mL             | 1.28 [1.28- 3.00]    | 1.28 [1.01- 2.06]    | 1.28 [1.28- 3.00]    | 0.432            |
| IL-1Ra pg/mL            | 6.51 [3.62- 10.17]   | 9.50 [5.29- 17.72]   | 7.56 [3.82- 12.47]   | <b>0.051</b>     |
| IL-2 pg/mL              | 0.64 [0.64- 0.64]    | 0.64 [0.64- 0.64]    | 0.64 [0.64- 0.64]    | <b>0.042</b>     |
| IL-4 pg/mL              | 1.44 [0.64- 3.76]    | 1.84 [0.88- 5.72]    | 1.60 [0.64- 3.86]    | 0.296            |

|                      |                           |                           |                           |                  |
|----------------------|---------------------------|---------------------------|---------------------------|------------------|
| IL-5 pg/mL           | 3.54 [2.15- 6.73]         | 4.00 [2.59- 7.21]         | 3.54 [2.29- 6.88]         | 0.523            |
| IL-6 pg/mL           | 4.23 [1.90- 7.26]         | 8.17 [2.87- 21.89]        | 4.83 [2.15- 9.08]         | <b>0.008</b>     |
| IL-10 pg/mL          | 2.56 [2.56- 2.56]         | 2.56 [2.56- 2.56]         | 2.56 [2.56- 2.56]         | 0.937            |
| IL-13 pg/mL          | 6.40 [6.40- 11.70]        | 6.40 [6.13- 6.40]         | 6.40 [6.40- 10.12]        | <b>0.044</b>     |
| IL-18 pg/mL          | 29.80 [20.26- 46.45]      | 36.79 [29.81- 46.69]      | 34.01 [23.73- 46.45]      | 0.394            |
| TNF- $\alpha$ ng/mL  | 17.47 [10.35- 29.90]      | 23.47 [17.52- 31.83]      | 19.14 [12.00- 30.75]      | 0.073            |
| Angiopoietin-2 ng/mL | 2.45 [1.71- 3.49]         | 4.89 [3.47- 9.02]         | 2.92 [1.92- 4.51]         | <b>&lt;0.001</b> |
| Endoglin ng/mL       | 1.71 [1.28- 2.08]         | 1.72 [1.51- 2.62]         | 1.71 [1.31- 2.15]         | 0.314            |
| Endothelin-1 pg/mL.  | 2.70 [2.70- 2.70]         | 2.70 [2.70- 2.70]         | 2.70 [2.70- 2.70]         | 0.113            |
| E-Selectin ng/mL     | 34.36 [23.87- 43.02]      | 29.38 [23.78- 40.07]      | 34.19 [23.82- 42.13]      | 0.418            |
| Thrombomodulin ng/mL | 1.19 [0.83- 1.82]         | 1.05 [0.65- 1.79]         | 1.13 [0.82- 1.82]         | 0.486            |
| sRAGE pg/mL.         | 56.21 [30.78- 92.81]      | 57.63 [42.86- 137.01]     | 56.21 [31.90- 97.12]      | 0.166            |
| sICAM.1 ng/mL        | 205.41 [159.88- 263.22]   | 186.92 [139.03- 278.49]   | 201.71 [154.75- 263.22]   | 0.558            |
| P-Selectin ng/mL     | 103.57 [77.70- 136.95]    | 99.85 [69.29- 158.47]     | 102.77 [74.50- 139.38]    | 0.907            |
| sVCAM.1 ng/mL        | 1036.44 [870.09- 1224.16] | 1072.30 [904.39- 1282.74] | 1036.44 [870.09- 1239.68] | 0.662            |
| PAI-1 ng/mL          | 178.88 [145.59- 240.35]   | 223.53 [173.39- 290.62]   | 189.48 [147.70- 241.46]   | 0.090            |
| vWF $\mu$ g/mL.      | 26.85 [17.70- 38.03]      | 32.08 [19.88- 47.11]      | 26.85 [17.90- 40.02]      | 0.341            |
| <b>Laboratory</b>    |                           |                           |                           |                  |
| White blood cells    | 9.05 [7.15- 10.80]        | 9.10 [7.88- 10.60]        | 9.05 [7.25- 10.72]        | 0.667            |
| Haemoglobin          | 12.05 [10.72- 13.12]      | 12.45 [11.60- 13.52]      | 12.10 [10.80- 13.22]      | 0.278            |
| Platelets            | 276.50 [205.75- 337.00]   | 282.00 [232.25- 312.75]   | 277.50 [216.75- 333.00]   | 0.670            |
| Neutrophils          | 6.40 [4.28- 7.47]         | 6.40 [5.48- 8.05]         | 6.40 [4.68- 7.80]         | 0.278            |
| Lymphocytes          | 1.90 [1.50- 2.27]         | 1.65 [1.33- 1.90]         | 1.80 [1.40- 2.20]         | <b>0.037</b>     |
| Monocytes            | 0.65 [0.50- 0.90]         | 0.70 [0.60- 0.80]         | 0.70 [0.50- 0.80]         | 0.552            |
| EGFR (Cock)          | 55.17 [42.45- 85.81]      | 66.69 [49.62- 80.42]      | 58.69 [42.70- 84.93]      | 0.608            |
| Triglycerides        | 120.00 [90.50- 154.50]    | 145.00 [90.25- 166.00]    | 121.00 [89.75- 161.50]    | 0.498            |
| HDL                  | 39.00 [34.25- 47.00]      | 37.00 [30.75- 39.00]      | 38.00 [33.00- 46.00]      | <b>0.052</b>     |
| LDL                  | 65.30 [52.50- 89.40]      | 67.00 [46.55- 82.15]      | 65.60 [51.50- 87.80]      | 0.840            |
| Hba1c                | 7.27 [6.38- 8.08]         | 7.50 [6.20- 8.71]         | 7.32 [6.34- 8.12]         | 0.576            |
| CRP                  | 1.20 [0.20- 3.20]         | 1.20 [0.40- 3.98]         | 1.20 [0.25- 3.20]         | 0.447            |
| Albumin              | 3.66 [3.33- 4.01]         | 3.45 [3.08- 3.87]         | 3.62 [3.29- 3.98]         | 0.210            |

**Table S3.** Descriptive statistics clusters outcome 3 (New lesion or recurrences).

|                         | <b>Cluster 1 ( n = 21)</b> | <b>Cluster 2 (n = 60)</b> | <b>Cluster 3 (n =11)</b> | <b>Overall</b>       | <b>p</b> |
|-------------------------|----------------------------|---------------------------|--------------------------|----------------------|----------|
| Age                     | 69.00 [62.00- 71.00]       | 74.00 [69.00- 79.25]      | 72.00 [69.00- 76.00]     | 72.50 [68.00- 78.00] | 0.031    |
| Sex Male                | 18 (85.7%)                 | 44 (73.3%)                | 9 (81.8%)                | 71 (77.2%)           | 0.571    |
| BMI                     | 27.46 [26.12- 31.38]       | 26.74 [24.69- 28.99]      | 26.02 [24.04- 26.38]     | 26.68 [24.93- 29.30] | 0.082    |
| Smoking status:         |                            |                           |                          |                      | 0.199    |
| Never                   | 4 (19.0%)                  | 19 (32.2%)                | 4 (36.4%)                | 27 (29.7%)           |          |
| Past                    | 12 (57.1%)                 | 36 (61.0%)                | 7 (63.6%)                | 55 (60.4%)           |          |
| Active                  | 5 (23.8%)                  | 4 (6.8%)                  | 0 (0.0%)                 | 9 (9.9%)             |          |
| Diabetes type II        | 21 (100.0%)                | 55 (91.7%)                | 9 (90.0%)                | 85 (93.4%)           | 0.568    |
| Insulin therapy         | 18 (85.7%)                 | 42 (73.7%)                | 7 (70.0%)                | 67 (76.1%)           | 0.523    |
| Carotid artery disease  | 1 (4.8%)                   | 7 (11.7%)                 | 0 (0.0%)                 | 8 (8.7%)             | 0.627    |
| Stroke or TIA           | 1 (5.0%)                   | 5 (8.3%)                  | 2 (18.2%)                | 8 (8.8%)             | 0.388    |
| Heart failure           | 4 (19.0%)                  | 3 (5.0%)                  | 1 (9.1%)                 | 8 (8.7%)             | 0.096    |
| Coronary artery disease | 10 (47.6%)                 | 26 (43.3%)                | 6 (54.5%)                | 42 (45.7%)           | 0.820    |

|                                 |                          |                           |                            |                           |        |
|---------------------------------|--------------------------|---------------------------|----------------------------|---------------------------|--------|
| Previous myocardial_in-farction | 1 (4.8%)                 | 5 (8.3%)                  | 4 (36.4%)                  | 1 (10.9%)                 | 0.030  |
| Valvular prosthesis             | 0 (0.0%)                 | 2 (3.4%)                  | 2 (18.2%)                  | 4 (4.4%)                  | 0.105  |
| Atrial fibrillation             | 6 (28.6%)                | 13 (21.7%)                | 3 (27.3%)                  | 22 (23.9%)                | 0.706  |
| <b>Biomarkers</b>               |                          |                           |                            |                           |        |
| sCD40L pg/mL                    | 23.29 [19.59- 26.07]     | 10.41 [7.35- 13.61]       | 4.05 [2.90- 8.79]          | 11.73 [7.32- 17.91]       | <0.001 |
| IFN- $\alpha$ 2 pg/mL           | 8.00 [8.00- 8.00]        | 8.00 [8.00- 8.00]         | 8.00 [8.00- 8.00]          | 8.00 [8.00- 8.00]         | 0.908  |
| IFN- $\gamma$ pg/mL             | 1.28 [1.23- 1.33]        | 1.28 [1.28- 1.48]         | 4.90 [1.28- 9.35]          | 1.28 [1.28- 3.00]         | 0.198  |
| IL-1Ra pg/mL                    | 8.75 [6.60- 21.71]       | 6.51 [3.24- 9.87]         | 6.14 [5.52- 11.68]         | 7.56 [3.82- 12.47]        | 0.053  |
| IL-2 pg/mL                      | 0.64 [0.64- 0.64]        | 0.64 [0.64- 0.64]         | 0.64 [0.64- 0.64]          | 0.64 [0.64- 0.64]         | 0.857  |
| IL-4 pg/mL                      | 4.53 [1.27- 6.53]        | 1.07 [0.64- 3.10]         | 2.55 [0.92- 3.36]          | 1.60 [0.64- 3.86]         | 0.010  |
| IL-5 pg/mL                      | 3.26 [2.24- 4.58]        | 3.62 [2.29- 6.93]         | 5.83 [2.81- 18.88]         | 3.54 [2.29- 6.88]         | 0.219  |
| IL-6 pg/mL                      | 9.80 [3.73- 18.31]       | 4.13 [1.76- 6.87]         | 4.32 [2.80- 6.95]          | 4.83 [2.15- 9.08]         | 0.053  |
| IL-10 pg/mL                     | 2.56 [2.56- 30.49]       | 2.56 [2.56- 2.56]         | 2.56 [2.56- 2.56]          | 2.56 [2.56- 2.56]         | 0.113  |
| IL-13 pg/mL                     | 6.40 [5.95- 12.92]       | 6.40 [6.40- 6.40]         | 6.40 [5.77- 9.30]          | 6.40 [6.40- 10.12]        | 0.973  |
| IL-18 pg/mL                     | 30.69 [22.76- 48.32]     | 34.01 [23.84- 45.69]      | 34.54 [29.97- 37.62]       | 34.01 [23.73- 46.45]      | 0.882  |
| TNF- $\alpha$ ng/mL             | 24.88 [18.52- 38.99]     | 16.67 [10.10- 26.79]      | 25.21 [13.44- 45.58]       | 19.14 [12.00- 30.75]      | 0.022  |
| Angiopoietin-2 ng/mL            | 3.26 [2.55- 5.42]        | 2.88 [1.90- 3.70]         | 3.09 [1.36- 6.59]          | 2.92 [1.92- 4.51]         | 0.301  |
| Endoglin ng/mL                  | 1.61 [1.33- 2.07]        | 1.61 [1.27- 1.95]         | 2.49 [2.25- 3.08]          | 1.71 [1.31- 2.15]         | 0.003  |
| Endothelin-1 pg/mL.             | 2.70 [2.70- 2.70]        | 2.70 [2.70- 2.70]         | 2.70 [2.12- 2.70]          | 2.70 [2.70- 2.70]         | 0.540  |
| E-Selectin ng/mL                | 35.23 [28.14- 45.50]     | 34.19 [23.37- 42.37]      | 28.00 [21.82- 34.83]       | 34.19 [23.82- 42.13]      | 0.291  |
| Thrombomodulin ng/mL            | 0.64 [0.48- 1.02]        | 1.24 [0.90- 1.57]         | 2.97 [2.64- 3.36]          | 1.13 [0.82- 1.82]         | <0.001 |
| sRAGE pg/mL.                    | 37.40 [25.20- 56.28]     | 72.42 [38.62- 113.48]     | 52.86 [40.28- 132.01]      | 56.21 [31.90- 97.12]      | 0.041  |
| sICAM.1 ng/mL                   | 223.36 [126.90- 353.66]  | 196.50 [158.03- 247.10]   | 239.26 [204.74- 303.94]    | 201.71 [154.75- 263.22]   | 0.384  |
| P-Selectin ng/mL                | 131.17 [114.16- 173.14]  | 91.41 [69.89- 124.93]     | 60.13 [45.17- 124.35]      | 102.77 [74.50- 139.38]    | 0.001  |
| sVCAM.1 ng/mL                   | 931.54 [757.10- 1059.31] | 1052.86 [914.94- 1239.57] | 1401.06 [1217.33- 1502.07] | 1036.44 [870.09- 1239.68] | 0.001  |
| PAI-1 ng/mL                     | 230.38 [211.09- 281.84]  | 182.59 [139.01- 239.26]   | 153.60 [119.21- 173.93]    | 189.48 [147.70- 241.46]   | 0.002  |
| vWF $\mu$ g/mL.                 | 31.05 [25.04- 38.65]     | 23.52 [16.90- 40.84]      | 36.05 [27.48- 43.03]       | 26.85 [17.90- 40.02]      | 0.177  |
| <b>Laboratory</b>               |                          |                           |                            |                           |        |
| White blood cells               | 10.90 [9.10- 12.50]      | 8.85 [6.97- 10.22]        | 8.50 [6.65- 9.40]          | 9.05 [7.25- 10.72]        | 0.001  |
| Haemoglobin                     | 12.20 [10.60- 14.30]     | 12.15 [10.88- 13.12]      | 11.20 [10.70- 12.30]       | 12.10 [10.80- 13.22]      | 0.391  |
| Platelets                       | 354.00 [269.00- 427.00]  | 274.50 [214.00- 314.50]   | 213.00 [179.00- 267.00]    | 277.50 [216.75- 333.00]   | 0.001  |
| Neutrophils                     | 7.80 [6.40- 8.60]        | 5.80 [4.10- 7.32]         | 6.00 [4.65- 7.00]          | 6.40 [4.68- 7.80]         | 0.002  |
| Lymphocytes                     | 1.80 [1.50- 2.00]        | 1.90 [1.48- 2.30]         | 1.40 [1.30- 1.75]          | 1.80 [1.40- 2.20]         | 0.130  |
| Monocytes                       | 0.90 [0.70- 1.00]        | 0.60 [0.50- 0.80]         | 0.60 [0.40- 0.65]          | 0.70 [0.50- 0.80]         | 0.001  |
| EGFR (Cock)                     | 74.86 [48.84- 94.70]     | 53.24 [40.12- 79.70]      | 55.74 [40.98- 70.25]       | 58.69 [42.70- 84.93]      | 0.059  |
| Triglycerides                   | 121.00 [93.00- 218.00]   | 127.00 [92.75- 162.50]    | 107.00 [67.50- 122.50]     | 121.00 [89.75- 161.50]    | 0.135  |
| HDL                             | 38.00 [29.00- 44.00]     | 38.50 [34.75- 47.00]      | 37.00 [34.00- 38.00]       | 38.00 [33.00- 46.00]      | 0.520  |
| LDL                             | 59.20 [48.20- 98.00]     | 69.00 [52.70- 84.60]      | 63.40 [42.50- 71.60]       | 65.60 [51.50- 87.80]      | 0.552  |
| Hba1c                           | 7.55 [6.91- 8.37]        | 7.50 [6.66- 8.12]         | 6.27 [5.54- 6.54]          | 7.32 [6.34- 8.12]         | 0.015  |
| CRP                             | 2.10 [0.73- 5.25]        | 0.90 [0.20- 2.73]         | 1.30 [0.25- 1.90]          | 1.20 [0.25- 3.20]         | 0.124  |

---

|         |                   |                   |                   |                   |       |
|---------|-------------------|-------------------|-------------------|-------------------|-------|
| Albumin | 3.48 [3.04- 3.93] | 3.68 [3.36- 4.00] | 3.62 [3.15- 3.90] | 3.62 [3.29- 3.98] | 0.241 |
|---------|-------------------|-------------------|-------------------|-------------------|-------|

---
